# Supplementary material for: Priming Maritime Pine Megagametophytes during Somatic Embryogenesis Improved Plant Adaptation to Heat Stress
Source: PubMed Central journal article supplement (PMC7996847; doi:10.3390/plants10030446), 2021-02-26
Supplement: plants-10-00446-s001.pdf [file plants-10-00446-s001.pdf]

**Supplementary Table 1.** Genes analyzed in maritime pine embryogenic masses and needles.

| Gene code | Protein                                           | Sequence                | Primers                  |                          | Tm | Product size |
|-----------|---------------------------------------------------|-------------------------|--------------------------|--------------------------|----|--------------|
|           |                                                   |                         | Forward                  | Reverse                  |    |              |
| APX       | <i>Ascorbate peroxidase</i>                       | AY485994 <sup>x</sup>   | GGTCTGGACATCGCAGTTAG     | CCACACCAGCCAACCTGATAA    | 62 | 91           |
| CCO       | <i>Caffeoyl CoA O-methyltransferase</i>           | AM502291.1 <sup>x</sup> | GCCGATGAGGGTCAATTTCT     | AATGCAAGGGCTGTGCT        | 62 | 110          |
| HSP       | <i>Heat shock protein HSP 70</i>                  | CT577590 <sup>x</sup>   | CACCAGCAGTGGGAATATCA     | AGGGCATCTGCAATCCTATC     | 62 | 90           |
| SOD       | <i>Cu-Zn-superoxide dismutase precursor</i>       | AF434186 <sup>x</sup>   | CAATGGCTGCATGTCAACAG     | CCATCAGAACCCGCAACTAT     | 62 | 117          |
| WKY       | Putative WRKY factor                              | CT582155 <sup>x</sup>   | CCCATTATCCTCCACTAACTCC   | GCTGAGAGATCGAACCAGTATAG  | 62 | 88           |
| AGO       | <i>Argonaute 9 (AGO9)</i>                         | 5048 <sup>y</sup>       | TGCAGATTCTTGTCATGCTTT    | CTGGCTCGCAGCTAAATGC      |    |              |
| BSH       | <i>Bushy Growth (BSH)</i>                         | 7514 <sup>y</sup>       | GGATTAGCAATGCTCAAAACAC   | GGCGAATGGGAATCAAGTTC     |    |              |
| CLF       | <i>Curly Leaf (CLF)</i>                           | 3877 <sup>y</sup>       | TGAAAAATACTGTGGGTGTTTCGA | CAGCAAAGCACGGGCATT       |    | [40]         |
| DCL       | <i>Dicer like protein 1 (DCL1)</i>                | 28419 <sup>y</sup>      | TGAACACCACCAAAGGAATTG    | TCTCGTCTTTGCTTGACTTATC   |    |              |
| HDA       | <i>Histone deacetylase 9 (HDA9)</i>               | 1009 <sup>y</sup>       | TCTATCGACCACACAAGGCATATC | CAAGTGCTGTGTATCAGGCGTTA  |    |              |
| DNM       | <i>DNA (C-5)-methyltransferase 1-like (DNMT1)</i> | Pp29536 <sup>z</sup>    | GGCTGGGTCACACTAATTCAAAG  | TGCTTCAGATCCACACTCCTG    |    | [41]         |
| H12       | <i>Histone 1.2 (H1.2)</i>                         | Pp46359 <sup>z</sup>    | CCCGCTTTTGATTTTGTCTGC    | CCTCGGCTTCTTTTCCTTTGC    |    |              |
| HIS       | <i>Histone 3 (HISTO 3)</i>                        | BX682612 <sup>x</sup>   | GCTGAGGCTTACCTTGTG       | CCAGTTGTATATCCTTAGGCATAA |    | [78]         |
| TUB       | <i>α-tubulin (α-TUB)</i>                          | sp_80862 <sup>x</sup>   | ATCTGGAGCCGACTGTCA       | TGATAAGCTGTTCAGGATGGAA   |    |              |

<sup>x</sup> Genbank; <sup>y</sup> Sustainpine; <sup>z</sup> Pp transcript
